# Supplementary material for: Descriptive Analysis of the Varroa Non-reproduction Trait in Honey Bee Colonies and Association with Other Traits Related to Varroa Resistance
Source: Preprints.org preprint supplement (doi:10.20944/preprints202007.0166.v1), 2020-07-09
Supplement: Supplementary file 1 [file supplementary]

# Supplementary Material

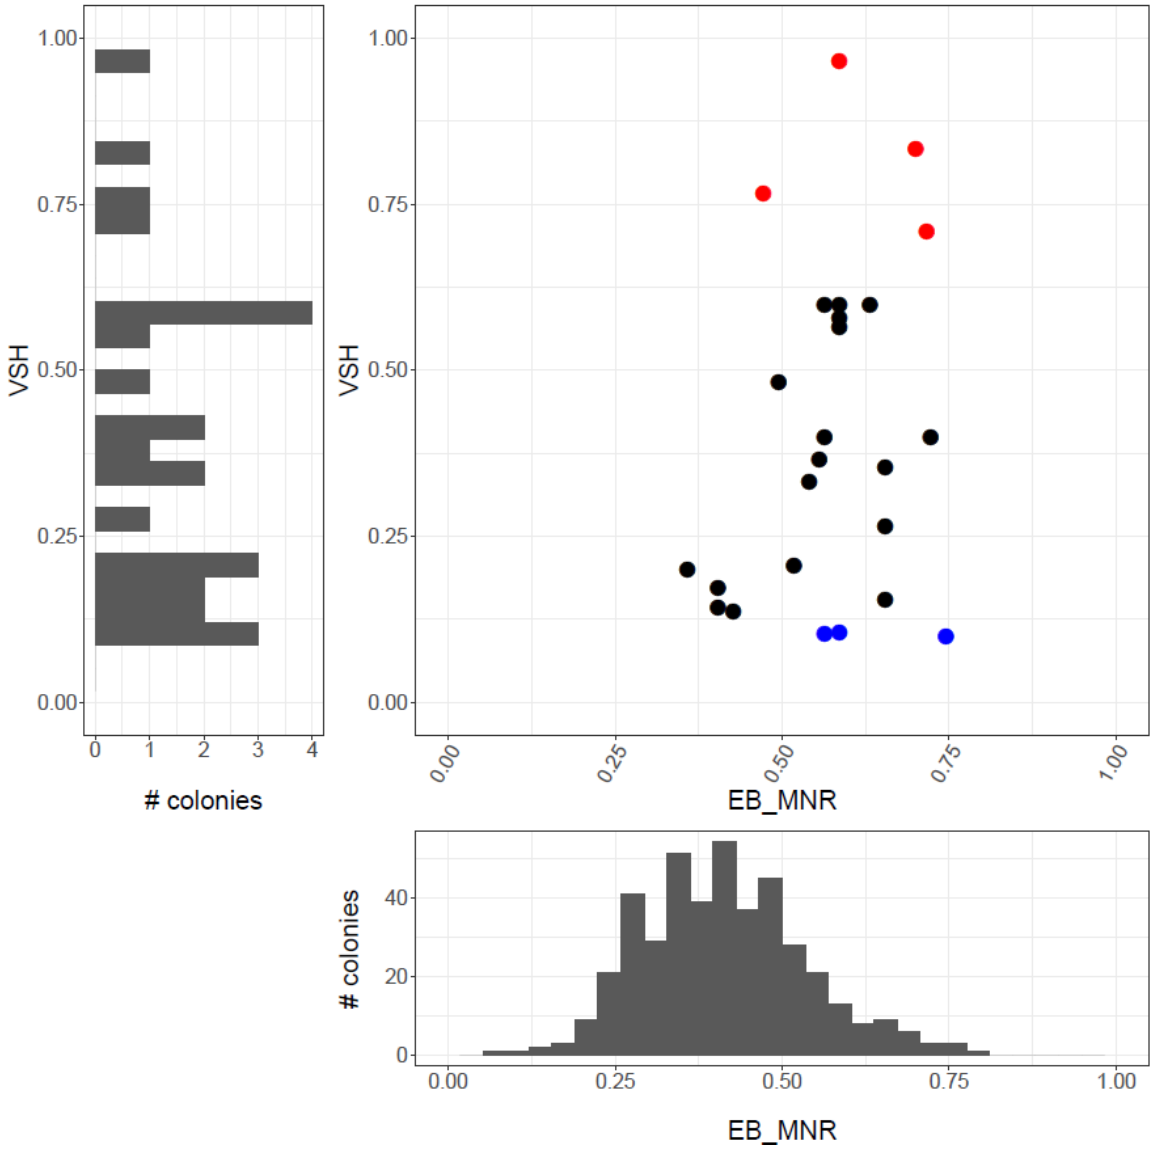

**Figure S1.** Scatterplot of VSH for EB\_MNR values for the 26 colonies used to estimate correlation between these traits. Red points are the colonies with (significantly) high VSH and the blue points with (significantly) low VSH values. The histograms represent the distribution, in number of colonies, of VSH and EB\_MNR.
